# Supplementary material for: First European Erwinia amylovora Lytic Bacteriophage Cocktails Effective in the Host: Characterization and Prospects for Fire Blight Biocontrol
Source: MDPI journal article supplement (doi:10.3390/biology13030176), 2024-03-08
Supplement: s1 [file s1]

Supplementary Table S1. Origin of a selection of 28 Mediterranean bacteriophages with lytic activity against *Erwinia amylovora* (Ea).

| Phage ID <sup>a</sup> | Sample material                                        | Location and Plot <sup>b</sup> | Spanish region       | Year | Ea strain lysed in the first phage isolation |
|-----------------------|--------------------------------------------------------|--------------------------------|----------------------|------|----------------------------------------------|
| UV_Eaφ1               | Plant material washings (pear trees)                   | Location 1, Plot 2             | Comunidad Valenciana | 2018 | UPN 527                                      |
| UV_Eaφ2               | Plant material processed by crushing (pear trees)      | Location 1, Plot 2             | Comunidad Valenciana | 2018 | UPN 527                                      |
| UV_Eaφ3               | Plant material washings (pear trees)                   | Location 1, Plot 2             | Comunidad Valenciana | 2018 | UPN 527                                      |
| UV_Eaφ4               | Plant material washings (pear trees)                   | Location 1, Plot 3             | Comunidad Valenciana | 2018 | UPN 527                                      |
| UV_Eaφ5               | Plant material washings (pear trees)                   | Location 1, Plot 2             | Comunidad Valenciana | 2018 | UPN 527                                      |
| <b>UV_Eaφ6</b>        | Plant material processed by crushing (pear trees)      | Location 1, Plot 3             | Comunidad Valenciana | 2018 | IVIA 1526.6                                  |
| UV_Eaφ7               | Plant material processed by crushing (pear trees)      | Location 1, Plot 3             | Comunidad Valenciana | 2018 | IVIA 1526.6                                  |
| UV_Eaφ8               | Plant material processed by crushing (pear trees)      | Location 1, Plot 2             | Comunidad Valenciana | 2018 | IVIA 1526.6                                  |
| UV_Eaφ9               | Plant material processed by crushing (pear trees)      | Location 1, Plot 4             | Comunidad Valenciana | 2018 | IVIA 1554                                    |
| UV_Eaφ10              | Soil under symptomatic pear trees                      | Location 1, Plot 2             | Comunidad Valenciana | 2018 | IVIA 1554                                    |
| UV_Eaφ11              | Plant material washings (pear trees)                   | Location 1, Plot 2             | Comunidad Valenciana | 2018 | IVIA 1554                                    |
| UV_Eaφ12              | Plant material processed by crushing (pear trees)      | Location 1, Plot 2             | Comunidad Valenciana | 2018 | IVIA 1554                                    |
| UV_Eaφ13              | Plant material washings (pear trees)                   | Location 1, Plot 2             | Comunidad Valenciana | 2018 | IVIA 1614.1                                  |
| UV_Eaφ14              | Plant material processed by crushing (pear trees)      | Location 1, Plot 4             | Comunidad Valenciana | 2018 | IVIA 1614.2                                  |
| UV_Eaφ15              | Plant material processed by crushing (pear trees)      | Location 1, Plot 2             | Comunidad Valenciana | 2018 | IVIA 1614.2                                  |
| UV_Eaφ16              | Soil under symptomatic pear trees                      | Location 1, Plot 2             | Comunidad Valenciana | 2018 | IVIA 1614.2                                  |
| UV_Eaφ17              | Plant material washings (pear trees)                   | Location 1, Plot 4             | Comunidad Valenciana | 2018 | IVIA 1614.2                                  |
| UV_Eaφ18              | Plant material processed by crushing (pear trees)      | Location 1, Plot 4             | Comunidad Valenciana | 2018 | IVIA 1614.2                                  |
| UV_Eaφ19              | Soil under symptomatic pear trees                      | Location 1, Plot 4             | Comunidad Valenciana | 2018 | IVIA 1892.1                                  |
| UV_Eaφ20              | Plant material processed by crushing (pear trees)      | Location 1, Plot 3             | Comunidad Valenciana | 2018 | IVIA 1892.1                                  |
| <b>UV_Eaφ21</b>       | Plant material washings (pear trees)                   | Location 1, Plot 2             | Comunidad Valenciana | 2018 | IVIA 1892.1                                  |
| UV_Eaφ22              | Plant material processed by crushing (pear trees)      | Location 1, Plot 2             | Comunidad Valenciana | 2018 | IVIA 1892.1                                  |
| UV_Eaφ23              | Plant material processed by crushing (pear trees)      | Location 1, Plot 2             | Comunidad Valenciana | 2018 | IVIA 1892.1                                  |
| <b>UV_Eaφ24</b>       | Soil under symptomatic pear trees                      | Location 1, Plot 3             | Comunidad Valenciana | 2018 | IVIA 1892.1                                  |
| <b>UV_Eaφ25</b>       | Water source nearby a plot with symptomatic pear trees | Location 2, Plot 4             | Comunidad Valenciana | 2018 | IVIA 1614.1                                  |
| UV_Eaφ26              | Water source nearby a plot with symptomatic pear trees | Location 2, Plot 4             | Comunidad Valenciana | 2018 | IVIA 1614.1                                  |
| <b>UV_Eaφ27</b>       | Plant material processed by crushing (pear trees)      | Location 2, Plot 4             | Comunidad Valenciana | 2018 | IVIA 1892.1                                  |
| <b>UV_Eaφ28</b>       | Water source nearby a plot with symptomatic pear trees | Location 2, Plot 4             | Comunidad Valenciana | 2018 | IVIA 1892.1                                  |

<sup>a</sup> Bold letters, phages selected to be mixed in phage cocktails.

<sup>b</sup> Former fire-blight affected plots of pear trees in two municipalities in the Comunidad Valenciana, Spain, under official control.
